# Supplementary material for: Binaphthyl-based chiral covalent organic frameworks for chiral drug separation
Source: Royal Society of Chemistry journal article supplement (doi:10.1039/d4cc02028f), 2024-01-01
Supplement: d4cc02028f1.pdf [file d4cc02028f1.pdf]

**Electronic Supplementary Information for**

**Binaphthyl-based chiral covalent organic frameworks for chiral drugs separation**

**Hui-Chao Ma,<sup>\*‡</sup> Hai-Ping Jiang,<sup>‡</sup> Zi-Hui Yao, Jun-Feng Tan, Yang-Yang Xing, Gong-Jun Chen<sup>\*</sup>**

**and Yu-Bin Dong<sup>\*</sup>**

College of Chemistry, Chemical Engineering and Materials Science, Collaborative Innovation Center of Functionalized Probes for Chemical Imaging in Universities of Shandong, Key Laboratory of Molecular and Nano Probes, Ministry of Education, Shandong Normal University, Jinan 250014, P. R. China.

Email: huichaoma@sdnu.edu.cn, gongjchen@126.com, yubindong@sdnu.edu.cn

**Contents**

- 1. Materials and instruments (page S2)**
- 2. Synthesis of monomers (page S2)**
- 3. Synthesis of (*R*)- and (*S*)-BHTP-COF (page S3)**
- 4. General procedure for column packing (page S4)**
- 5. Figures S1-S5 (page S4)**
- 6. Tables S1-S4 (page S8)**
- 7. References (page S13)**

## 1. Materials and instruments

The reagents and solvents are commercially available and used without further purification. Building block 2, 4, 6-triformylphloroglucinol (TP) was synthesized according to previously published procedure. (*R*)- and (*S*)-DCDB were synthesized according to our reported procedure.<sup>1</sup>

The powder diffractometer (XRD) patterns were collected by a D8 ADVANCEX-ray with Cu K $\alpha$  radiation ( $\lambda = 1.5405 \text{ \AA}$ ). The total surface areas of the catalysts were measured by the BET (Brunauer–Emmer–Teller) method using N<sub>2</sub> adsorption at 77 K, this was done by the Micromeritics ASAP 2000 sorption/desorption analyzer. HRTEM (High resolution transmission electron microscopy) analysis was performed on a JEOL 2100 Electron Microscope at an operating voltage of 200 kV. Scanning electron microscopy (SEM) images were taken on a SUB010 scanning electron microscope with acceleration voltage of 20 kV. Elemental analyses for C, H and N were obtained on a Perkin-Elmer analyzer model 240. Infrared (IR) samples were prepared as KBr pellets, and spectra were obtained in the 400-4000 cm<sup>-1</sup> range using a Perkin-Elmer 1600 FTIR spectrometer. <sup>13</sup>C solid-state NMR spectra were recorded on a MERCURY plus 400 spectrometer operating at resonance frequencies of 400 MHz. Thermogravimetric analyses (TGA) were carried out under flowing nitrogen at a heating rate of 10 °C·min<sup>-1</sup> on a TA Instrument Q5 analyzer. High-resolution mass spectrometry (HRMS) analysis was carried out on a Bruker maXis ultrahigh-resolution-TOF mass spectrometer. The solid-state CD spectra were recorded on a J-815 spectropolarimeter (Jasco, Japan). <sup>1</sup>H NMR data were collected on an AM-400 spectrometer. Chemical shifts are reported in  $\delta$  relative to TMS. Enantiomer ratios were determined by chiral HPLC analysis using a Shimadzu LC-10AT VP series and a Shimadzu LC-10A VP UV-vis.

## 2. Synthesis of monomers

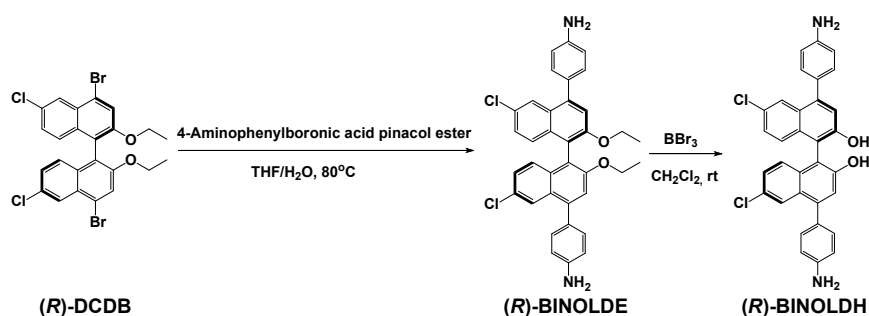

Under nitrogen, a mixture of (*R*)-DCDB (0.57g, 1.0 mmol), 4-aminophenylboronic acid pinacol ester (0.44 g, 2.0 mmol), Pd(PPh<sub>3</sub>)<sub>4</sub> (0.08 g, 0.06 mmol) and K<sub>2</sub>CO<sub>3</sub> (0.82 g, 6.0 mmol) in THF (30 mL)/H<sub>2</sub>O (10.0 mL) was refluxed for 36 h. After removed the solvent, the residue was redissolved in CH<sub>2</sub>Cl<sub>2</sub> and dried over MgSO<sub>4</sub>. The obtained crude product was purified by the column on silica gel using CH<sub>2</sub>Cl<sub>2</sub>/THF (10:1, v/v) as eluent to give (*R*)-BINOLDE in 83% yield. <sup>1</sup>H NMR (400 MHz, CDCl<sub>3</sub>) δ=7.88 (d, J = 7.1 Hz, 1H), 7.70 (t, J = 25.5 Hz, 1H), 7.34 (d, J = 16.0 Hz, 1H), 7.26-7.12 (m, 1H), 4.11 (d, J = 6.7 Hz, 1H), 1.13 (t, J = 6.1 Hz, 1H). IR (KBr pellet cm<sup>-1</sup>): 3203(vs), 2262(w), 1494(s), 1366(m), 1175(s), 1145(m), 1040(w), 946(m), 884(w), 826(w), 726(m), 637(w), 549(m). <sup>13</sup>C NMR (400 MHz, CDCl<sub>3</sub>): δ 156.13, 144.54, 136.76, 132.97, 132.05, 129.06, 128.24, 127.75, 126.28, 122.85, 120.63, 119.97, 118.94, 62.7, 15.2. ESI-MS: m/z, Anal. Calcd: 615.14, Exp: 615.14, [M+Na]<sup>+</sup>.

(*R*)-BINOLDH was obtained by stirring the suspended (*R*)-BINOLDE (0.61 g, 1.0 mmol) in CH<sub>2</sub>Cl<sub>2</sub> (10.0mL) with excess BBr<sub>3</sub> (570 μL, 6.0 mmol) for 24 h. Quenching reaction with ice water, the organic layer was separated, and the aqueous layer was completely extracted with CH<sub>2</sub>Cl<sub>2</sub>, dried with MgSO<sub>4</sub> and concentrated in vacuo to provide (*R*)-BINOLDH (86%) as a beige crystalline solid. <sup>1</sup>H NMR (400 MHz, DMSO): δ=7.48-7.22 (m, 4H), 7.05 (dd, J = 42.9, 27.0 Hz, 1H), 0.00 (d, J = 63.5 Hz, 2H), 0.00 (dd, J = 44.3, 13.7 Hz, 3H), 0.00 (d, J = 43.5 Hz, 1H). IR (KBr pellet cm<sup>-1</sup>): 3203(vs), 2262(w), 1586(w), 1490(s), 1377(m), 1195(s), 1149(w), 1020(w), 946(w), 884(w), 816(w), 726(m), 636(m), 549(m). <sup>13</sup>C NMR (400 MHz, CDCl<sub>3</sub>): δ 155.21, 146.84, 144.34, 137.62, 132.75, 131.26, 128.07, 127.04, 126.76, 124.31, 119.86, 118.73, 115.60.

ESI-MS: m/z, Anal. Calcd: 537.10, Exp: 537.11, [M+Na]<sup>+</sup>. (*S*)-BINOLDH was synthesized following the same method mentioned above except that (*S*)-DCDB was used instead of (*R*)-DCDB.

### 3. Synthesis of (*R*)- and (*S*)-BHTP-COF

An *o*-dichlorobenzene (*o*-DCB)/*n*-BuOH (0.5/0.5 mL) mixture of (*R*)- or (*S*)-BINOLDH (0.12 mmol, 64.5 mg), TP (0.08 mmol, 16.8 mg) and acetic acid (30 μL) in a Pyrex tube (35 mL) were degassed via three freeze-pump-thaw cycles. The tube was sealed and heated under N<sub>2</sub> at 120 °C in an oil bath for 3 days. The solids were separated via centrifugation after cooling to room temperature. The powder was washed several

times with dichloromethane and ethanol via centrifugation and dried under vacuum to produce (*R*)- or (*S*)-**BHTP-COF** in 92 % yield. Elemental Analysis (%) calcd for C<sub>14</sub>H<sub>11</sub>N<sub>2</sub>O: C, 75.32; N, 12.55; H, 4.97. Found (%): C, 76.15; N, 12.13; H, 5.31.

#### 4. General procedure for column packing

The stationary material materials including (*R*)- or (*S*)-**BHTP-COF** materials were packed with the same method. (*R*)- or (*S*)-**BHTP-COF** was dispersed in a mixture of *n*-hexane/isopropanol (9:1, v/v) for 10 min. The suspension was then packed into an empty stainless-steel column (20 cm long x 4.2 mm id) under 40 MPa using *n*-hexane/isopropanol as the displacement liquid. The prepared columns were conditioned with *n*-hexane/isopropanol (9:1, v/v) at a flow rate of 0.5 mL/min for 2 h before chromatographic experiments.

Separation factor ( $\alpha$ ) and resolution factor ( $R_s$ ) were obtained from the following equations:

$$\alpha = (t_{R2} - t_0)/(t_{R1} - t_0) \quad R_s = 2(t_{R2} - t_{R1})/(w_1 + w_2)$$

Where  $t_{R1}$  and  $t_{R2}$  represent the retention times of right-handed or left-handed enantiomers ( $t_{R2} > t_{R1}$ ), and  $w_1$  and  $w_2$  are the widths of the bases formed by triangulation of the peaks, respectively. The column void time is  $t_0$ .

#### 5. Figures S1-S5

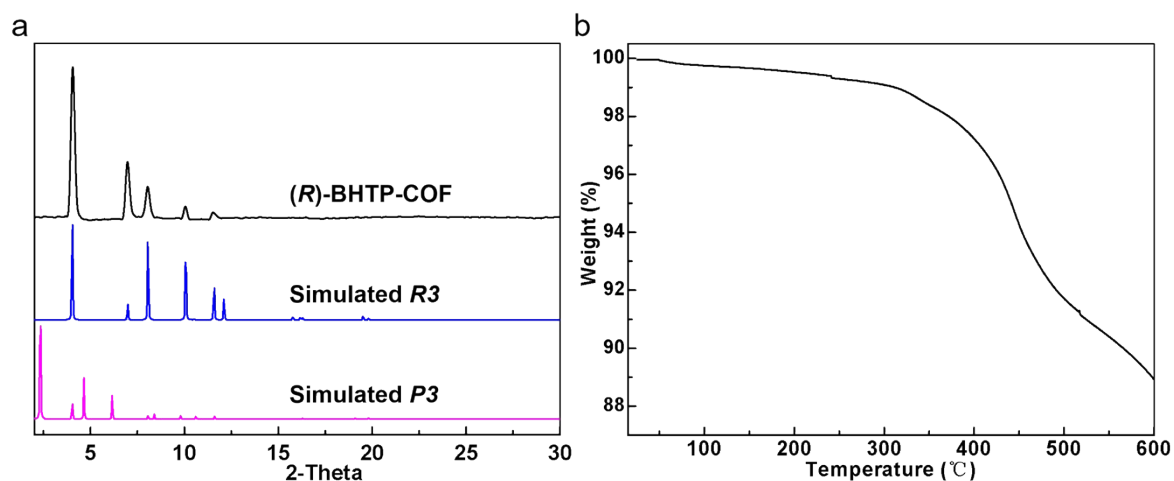

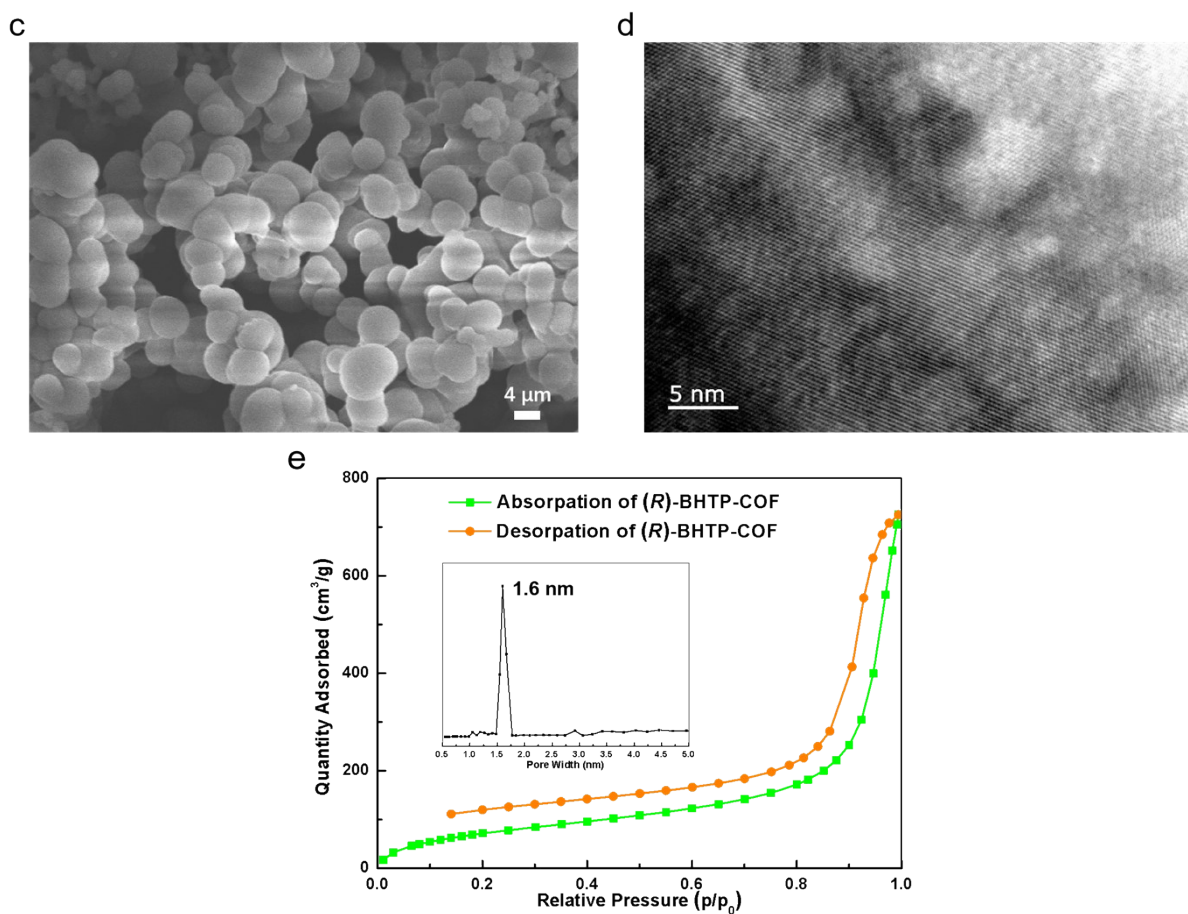

**Fig. S1** Characterization of (R)-BHTP-COF. (a) Measured and simulated PXRD patterns for (R)-BHTP-COF. Compared to the pattern generated from the *P3* space group (pink line), (R)-BHTP-COF unequivocally crystallizes in the *R3* space group (blue line). (b) TGA trace of (R)-BHTP-COF. (c) SEM image of (R)-BHTP-COF. (d) HR-TEM image of (R)-BHTP-COF. (e) N<sub>2</sub> adsorption and desorption isotherms of (R)-BHTP-COF at 77 K. Its pore width distribution is inserted.

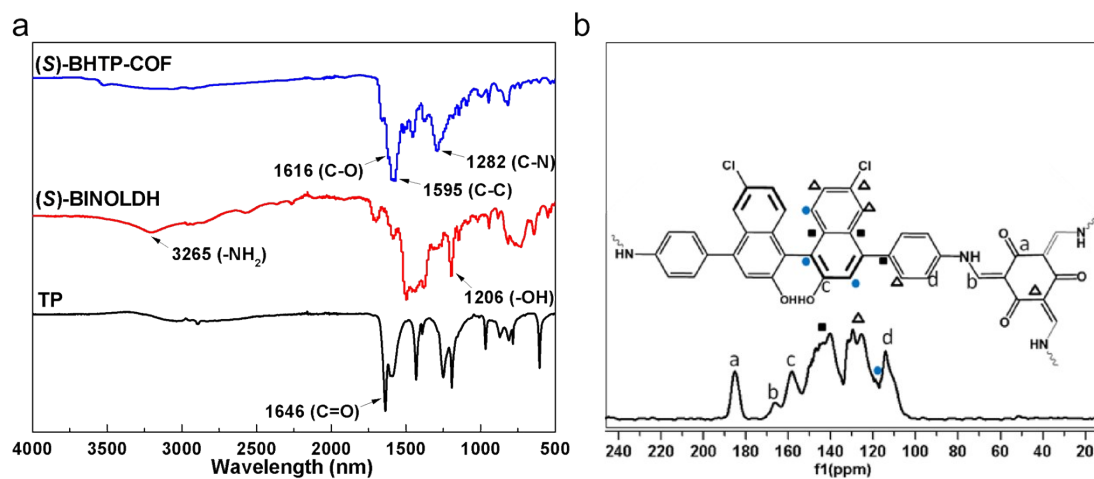

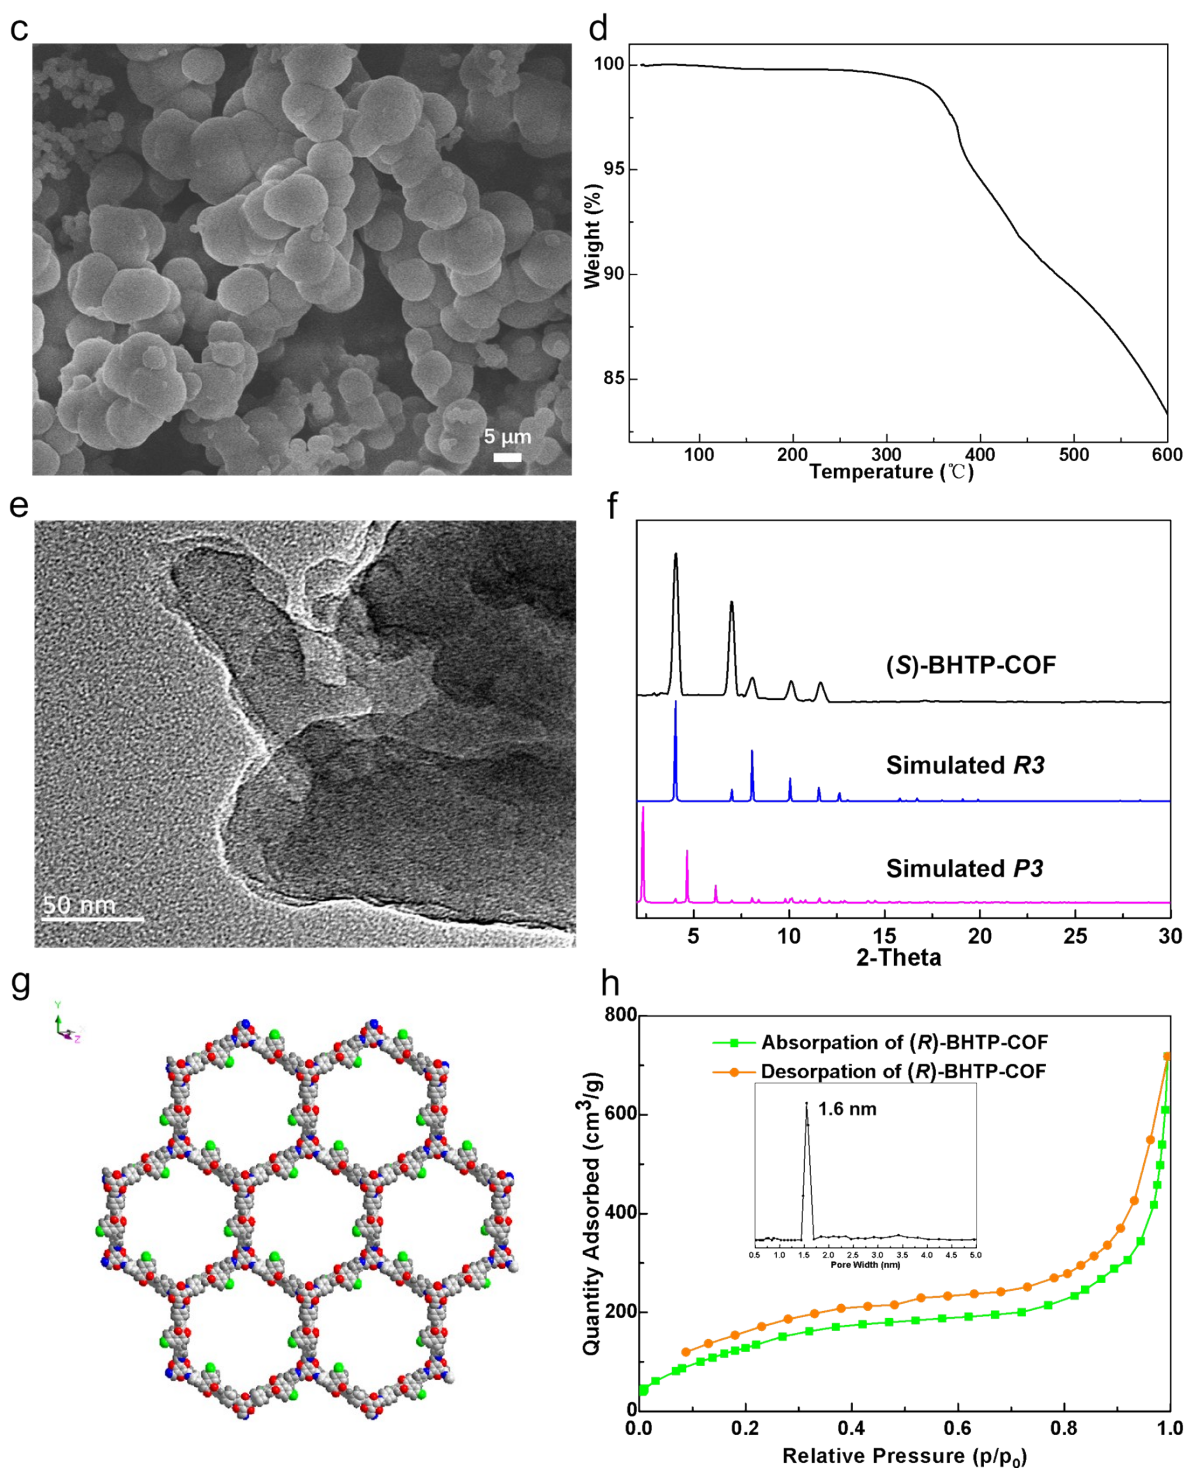

**Fig. S2** Characterization of (S)-BHTP-COF. (a) FT-IR spectra of (S)-BHTP-COF and its monomers. (b) Solid-state  $^{13}\text{C}$  CP-MAS NMR spectrum of (S)-BHTP-COF. (c) SEM image of (S)-BHTP-COF. (d) TGA trace of (S)-BHTP-COF. (e) SEM image of (S)-BHTP-COF. (f) Measured and simulated PXRD patterns for (S)-BHTP-COF. Compared to the pattern generated from the *P3* space group (pink line), (S)-BHTP-COF unequivocally

crystallizes in the  $R3$  space group (blue line). (g) Crystal structure of (*S*)-**BHTP-COF**. (h)  $N_2$  adsorption and desorption isotherms of (*S*)-**BHTP-COF** at 77 K. Its pore width distribution is inserted.

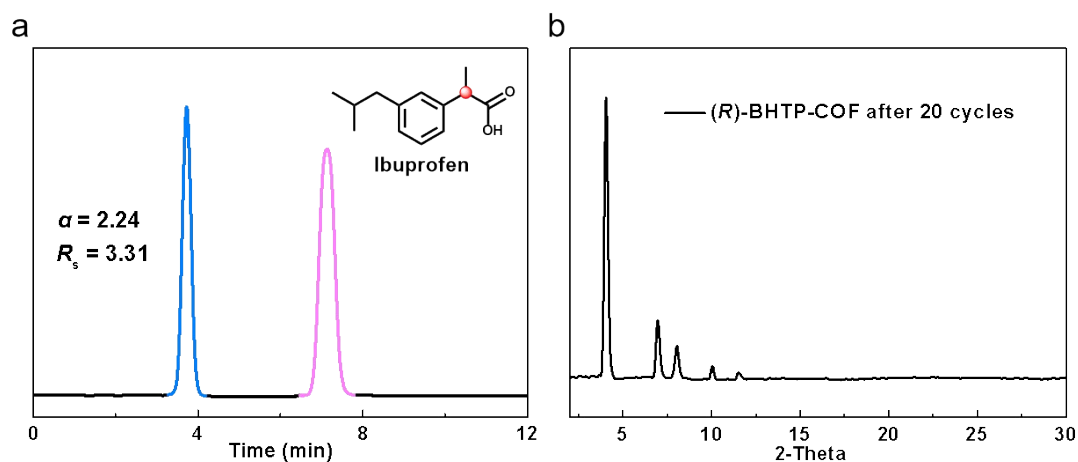

**Fig. S3** (a) HPLC chromatograms of ibuprofen enantiomers on the (*R*)-**BHTP-COF** packed column using the same eluent conditions obtained for 20 inject runs. (b) PXRD pattern of the (*R*)-**BHTP-COF** after 20 catalytic cycles.

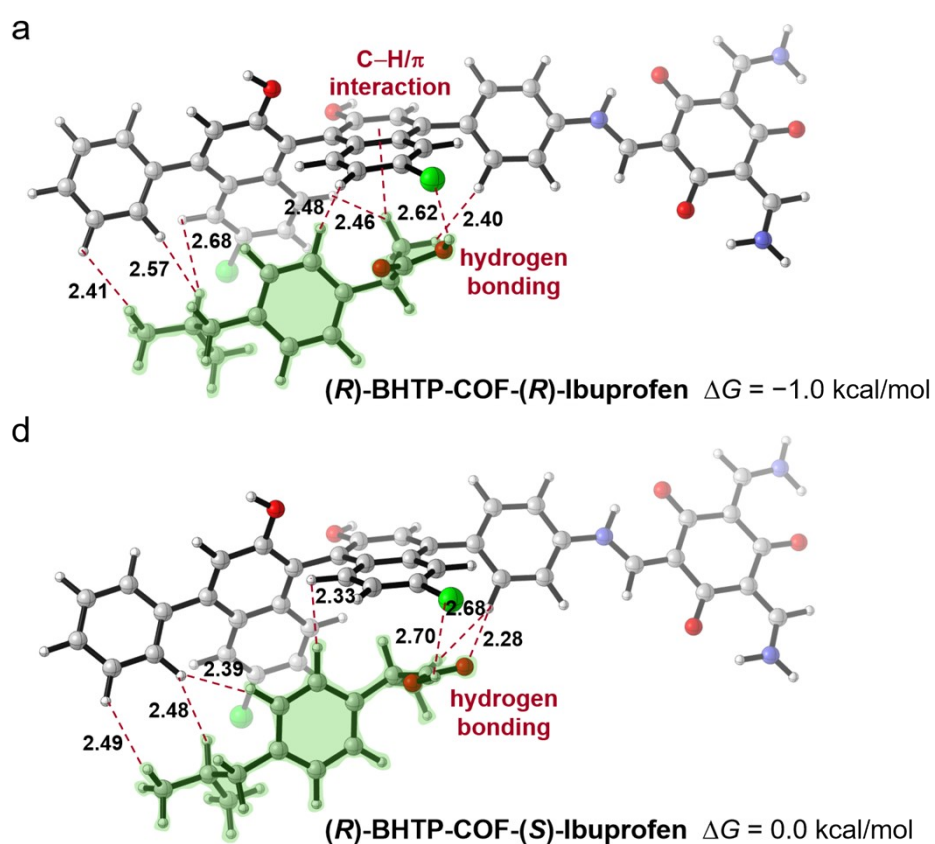

**Fig. S4** The molecular models of the ibuprofen *R*-enantiomer (a) and *S*-enantiomer (b) interacting with (*R*)-

**BHTP-COF** (The bond distances given in angstroms). All density functional theory (DFT) calculations were performed with the Gaussian16 package.<sup>2</sup> The geometry optimizations were carried out in the gas phase at the B3LYP level of theory<sup>3,4</sup> with additional Grimme's D3 dispersion correction (Becke-Johnson damping),<sup>5</sup> with the def2-SVP basis set.<sup>6,7</sup> The 3D structures shown were illustrated using CYLview.<sup>8</sup>

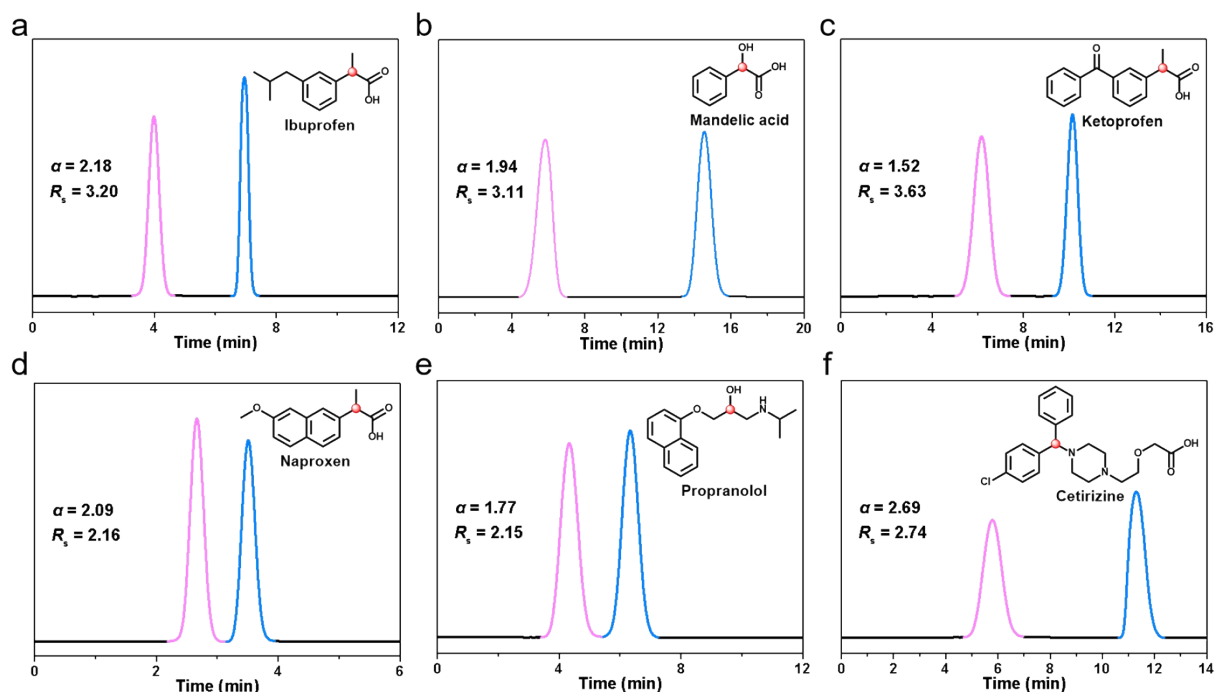

**Fig. S5** HPLC chromatograms of the six racemic drugs including ibuprofen(a), mandelic acid (b), ketoprofen(c), naproxen(d), propranolol (e), cetirizine (f) with the (*S*)-**BHTP-COF** packed column (mobile phase n-hexane/isopropanol (9:1, v/v), 0.3 mL/min flow rate, detection wavelength 254 nm, temperature 25 °C).

## 6. Tables S1-S4

**Table S1.** The structure model of (*R*)-**BHTP-COF** with *R3* mode.

| <i>(R)</i> - <b>BHTP-COF</b> Space group: <i>R3</i>                              |          |          |         |
|----------------------------------------------------------------------------------|----------|----------|---------|
| $a = 43.8379 \text{ \AA}$ , $b = 43.8379 \text{ \AA}$ , $c = 9.0257 \text{ \AA}$ |          |          |         |
| $\alpha = 90.0^\circ$ , $\beta = 90^\circ$ , $\gamma = 120.0^\circ$              |          |          |         |
| Atom                                                                             | x        | y        | z       |
| C1                                                                               | -1.30833 | 0.32246  | 0.34009 |
| C2                                                                               | -1.29726 | -0.64152 | 0.33956 |
| C3                                                                               | -1.20655 | -0.59797 | 0.20363 |
| C4                                                                               | -1.1937  | -0.56897 | 0.10834 |



|      |          |          |          |
|------|----------|----------|----------|
| C5   | -1.15759 | -0.54413 | 0.10086  |
| C6   | -1.13392 | -0.55002 | 0.18775  |
| C7   | -1.14714 | -0.57748 | 0.29382  |
| C8   | -1.18337 | -0.60149 | 0.29864  |
| C9   | -1.09529 | -0.53323 | 0.17966  |
| C10  | -1.07522 | -0.5154  | 0.05329  |
| C11  | -1.03794 | -0.49977 | 0.05801  |
| C12  | -1.02154 | -0.50303 | 0.18771  |
| C13  | -1.04175 | -0.52156 | 0.31149  |
| C14  | -1.07841 | -0.53602 | 0.30652  |
| C15  | -0.98283 | -0.48787 | 0.19704  |
| C16  | -0.96305 | -0.45593 | 0.27364  |
| C17  | -0.92655 | -0.44196 | 0.29005  |
| C18  | -0.90967 | -0.45931 | 0.23254  |
| C19  | -0.9298  | -0.49253 | 0.16222  |
| C20  | -0.96655 | -0.50644 | 0.14144  |
| C21  | -0.84913 | -0.44516 | 0.34037  |
| C22  | -0.87084 | -0.44019 | 0.23735  |
| C23  | -0.85548 | -0.41581 | 0.11924  |
| C24  | -0.81877 | -0.3946  | 0.11358  |
| C25  | -0.79732 | -0.39822 | 0.218    |
| C26  | -0.81242 | -0.42372 | 0.32881  |
| C27  | -0.70329 | -0.35581 | 0.09487  |
| C28  | -0.68907 | -0.31924 | 0.0948   |
| C29  | -1.09126 | -0.51211 | -0.07669 |
| C30  | -1.07098 | -0.49388 | -0.19955 |
| C31  | -1.03444 | -0.47855 | -0.19473 |
| C32  | -1.01798 | -0.48135 | -0.06739 |
| C33  | -0.98635 | -0.53899 | 0.06744  |
| C34  | -0.97039 | -0.55771 | 0.0173   |
| C35  | -0.93469 | -0.54485 | 0.04266  |
| C36  | -0.91461 | -0.51281 | 0.11582  |
| O37  | -1.02389 | -0.52482 | 0.43574  |
| O38  | -0.98115 | -0.43921 | 0.32933  |
| Cl39 | -1.09157 | -0.49047 | -0.36056 |
| Cl40 | -0.91498 | -0.56914 | -0.01598 |
| H41  | -1.09452 | -0.55029 | 0.40875  |

|     |          |          |          |
|-----|----------|----------|----------|
| H42 | -0.9101  | -0.416   | 0.35122  |
| H43 | -1.12111 | -0.52442 | -0.08215 |
| H44 | -1.0179  | -0.46366 | -0.29511 |
| H45 | -0.98806 | -0.46855 | -0.06532 |
| H46 | -1.01576 | -0.55024 | 0.04811  |
| H47 | -0.98658 | -0.58361 | -0.04463 |
| H48 | -0.88556 | -0.50304 | 0.13806  |
| N49 | 2.24135  | 0.62304  | 1.21892  |
| C50 | 2.25945  | 0.62192  | 1.1078   |
| C51 | 0.7402   | 0.3791   | 0.33029  |
| N52 | 0.75565  | 0.37597  | 0.21355  |
| O53 | 1.28962  | 0.69063  | 0.0948   |
| O54 | 0.71436  | 0.31435  | 0.34009  |
| H55 | -1.21266 | -0.56514 | 0.03476  |
| H56 | -1.14791 | -0.52    | 0.02655  |
| H57 | -1.12835 | -0.57985 | 0.37405  |
| H58 | -1.19387 | -0.62413 | 0.38151  |
| H59 | -0.86162 | -0.46622 | 0.42993  |
| H60 | -0.87297 | -0.41374 | 0.03103  |
| H61 | -0.80596 | -0.37397 | 0.02261  |
| H62 | -0.79447 | -0.427   | 0.41068  |
| H63 | 2.24567  | 0.60243  | 1.01375  |
| H64 | 0.75651  | 0.39801  | 0.4226   |
| H65 | -1.03361 | -0.51847 | 0.53815  |
| H66 | -0.9622  | -0.41436 | 0.38584  |
| H67 | 2.25502  | 0.64012  | 1.31559  |
| H68 | 0.74035  | 0.3549   | 0.13151  |

**Table S2.** The structure model of (S)-BHTP-COF with *R3* mode.

| (S)-BHTP-COF Space group: <i>R3</i>                                        |          |          |         |
|----------------------------------------------------------------------------|----------|----------|---------|
| $a = 43.8379 \text{ \AA}, b = 43.8379 \text{ \AA}, c = 9.0257 \text{ \AA}$ |          |          |         |
| $\alpha = 90.0^\circ, \beta = 90^\circ, \gamma = 120.0^\circ$              |          |          |         |
| Atom                                                                       | x        | y        | z       |
| C1                                                                         | -1.30833 | 0.32246  | 0.34009 |
| C2                                                                         | -1.29726 | -0.64152 | 0.33956 |
| C3                                                                         | -1.20655 | -0.59797 | 0.20363 |
| C4                                                                         | -1.1937  | -0.56897 | 0.10834 |

|     |          |          |         |
|-----|----------|----------|---------|
| C5  | -1.15759 | -0.54413 | 0.10086 |
| C6  | -1.13392 | -0.55002 | 0.18775 |
| C7  | -1.14714 | -0.57748 | 0.29382 |
| C8  | -1.18337 | -0.60149 | 0.29864 |
| C9  | -0.84913 | -0.44516 | 0.34037 |
| C10 | -0.87084 | -0.44019 | 0.23735 |
| C11 | -0.85548 | -0.41581 | 0.11924 |
| C12 | -0.81877 | -0.3946  | 0.11358 |
| C13 | -0.79732 | -0.39822 | 0.218   |
| C14 | -0.81242 | -0.42372 | 0.32881 |
| C15 | -0.70329 | -0.35581 | 0.09487 |
| C16 | -0.68907 | -0.31924 | 0.0948  |
| N17 | 2.24135  | 0.62304  | 1.21892 |
| C18 | 2.25945  | 0.62192  | 1.1078  |
| C19 | 0.7402   | 0.3791   | 0.33029 |
| N20 | 0.75565  | 0.37597  | 0.21355 |
| O21 | 1.28962  | 0.69063  | 0.0948  |
| O22 | 0.71436  | 0.31435  | 0.34009 |
| H23 | -1.21266 | -0.56514 | 0.03476 |
| H24 | -1.14791 | -0.52    | 0.02655 |
| H25 | -1.12835 | -0.57985 | 0.37405 |
| H26 | -1.19387 | -0.62413 | 0.38151 |
| H27 | -0.86162 | -0.46622 | 0.42993 |
| H28 | -0.87297 | -0.41374 | 0.03103 |
| H29 | -0.80596 | -0.37397 | 0.02261 |
| H30 | -0.79447 | -0.427   | 0.41068 |
| H31 | 2.24567  | 0.60243  | 1.01375 |
| H32 | 0.75651  | 0.39801  | 0.4226  |
| C33 | 0.53867  | 0.44177  | 0.17415 |
| C34 | 0.52076  | 0.4452   | 0.04976 |
| C35 | 0.50591  | 0.46756  | 0.0589  |
| C36 | 0.51035  | 0.48709  | 0.19019 |
| C37 | 0.53065  | 0.48555  | 0.30668 |
| C38 | 0.5442   | 0.46289  | 0.29919 |
| C39 | 0.49327  | 0.5087   | 0.21013 |
| C40 | 0.50773  | 0.54137  | 0.1383  |
| C41 | 0.49129  | 0.5615   | 0.1481  |

|      |         |         |          |
|------|---------|---------|----------|
| C42  | 0.46041 | 0.54986 | 0.23105  |
| C43  | 0.44685 | 0.51815 | 0.31358  |
| C44  | 0.46299 | 0.49705 | 0.30058  |
| C45  | 0.51782 | 0.42738 | -0.08435 |
| C46  | 0.49991 | 0.4308  | -0.2054  |
| C47  | 0.48433 | 0.45172 | -0.19461 |
| C48  | 0.48702 | 0.4698  | -0.06356 |
| C49  | 0.44835 | 0.46477 | 0.37832  |
| C50  | 0.41923 | 0.4542  | 0.47042  |
| C51  | 0.40421 | 0.47543 | 0.48746  |
| C52  | 0.41788 | 0.5072  | 0.41047  |
| O53  | 0.53595 | 0.50498 | 0.43271  |
| O54  | 0.53737 | 0.55325 | 0.05284  |
| CI55 | 0.49722 | 0.40889 | -0.37173 |
| CI56 | 0.36819 | 0.46214 | 0.60706  |
| H57  | 0.56003 | 0.46166 | 0.39689  |
| H58  | 0.50296 | 0.58786 | 0.0881   |
| H59  | 0.53014 | 0.40992 | -0.09484 |
| H60  | 0.46934 | 0.45409 | -0.29301 |
| H61  | 0.47379 | 0.48648 | -0.05583 |
| H62  | 0.46036 | 0.44708 | 0.36607  |
| H63  | 0.40762 | 0.42806 | 0.53218  |
| H64  | 0.40541 | 0.5244  | 0.42643  |
| H65  | 2.25502 | 0.64012 | 1.31559  |
| H66  | 0.74035 | 0.3549  | 0.13151  |
| H67  | 0.51013 | 0.49913 | 0.47908  |
| H68  | 0.55895 | 0.57793 | 0.10112  |

**Table S3.** Comparison of separation performance of three racemic drugs by HPLC columns packed with (*R*)-**BHTP-COF**, and several commercial CSPs.

| Chiral drugs | This work |           | Chiralcel OD-H <sup>9</sup> |           | Chiralpak AD-H <sup>10</sup> |           |
|--------------|-----------|-----------|-----------------------------|-----------|------------------------------|-----------|
|              | $\alpha$  | <i>Rs</i> | $\alpha$                    | <i>Rs</i> | $\alpha$                     | <i>Rs</i> |
| Ibuprofen    | 2.32      | 3.39      | 1.85                        | 1.32      | C.S.                         | C.S.      |

|               |      |      |      |      |      |      |
|---------------|------|------|------|------|------|------|
| Mandelic acid | 2.05 | 3.17 | C.S. | C.S. | 1.08 | 2.39 |
| Naproxen      | 2.16 | 2.04 | 2.09 | 2.74 | 2.28 | 4.45 |

C.S.: Cannot be separated.

**Table S4.** Enantioseparation data on the (S)-BHTP-COF packed HPLC column.

| Chiral drugs  | $\alpha$ | $R_s$ | Mobile phase |
|---------------|----------|-------|--------------|
| Ibuprofen     | 2.18     | 3.20  | a            |
| Mandelic acid | 1.94     | 3.11  | a            |
| Ketoprofen    | 1.52     | 3.63  | a            |
| Naproxen      | 2.09     | 2.16  | b            |
| Propranolol   | 1.77     | 2.15  | c            |
| Cetirizine    | 2.69     | 2.74  | c            |

## 7. References

- [1] C. Valente, E. Choi, M. E. Belowich, C. J. Doonan, Q. Li, T. B. Gasa, Y. Y. Botros, O. M. Yaghi, J. F. Stoddart, *Chem. Commun.*, 2010, **46**, 4911-4913.
- [2] M. J. Frisch, G. W. Trucks, H. B. Schlegel, G. E. Scuseria, M. A. Robb, J. R. Cheeseman, G. Scalmani, V. Barone, G. A. Petersson, H. Nakatsuji, X. Li, M. Caricato, A. V. Marenich, J. Bloino, B. G. Janesko, R. Gomperts, B. Mennucci, H. P. Hratchian, J. V. Ortiz, A. F. Izmaylov, J. L. Sonnenberg, D. Williams-Young, F. Ding, F. Lipparini, F. Egidi, J. Goings, B. Peng, A. Petrone, T. Henderson, D. Ranasinghe, V. G. Zakrzewski, J. Gao, N. Rega, G. Zheng, W. Liang, M. Hada, M. Ehara, K. Toyota, R. Fukuda, J. Hasegawa, M. Ishida, T. Nakajima, Y. Honda, O. Kitao, H. Nakai, T. Vreven, K. Throssell, J. A. Montgomery, Jr., J. E. Peralta, F. Ogliaro, M. J. Bearpark, J. J. Heyd, E. N. Brothers, K. N. Kudin, V. N. Staroverov, T. A. Keith, R. Kobayashi, J. Normand, K. Raghavachari, A. P. Rendell, J. C. Burant, S. S. Iyengar, J. Tomasi, M. Cossi, J. M. Millam, M. Klene, C.

Adamo, R. Cammi, J. W. Ochterski, R. L. Martin, K. Morokuma, O. Farkas, J. B. Foresman, and D. J. Fox,  
Gaussian 16, Revision A.03, Gaussian, Inc., Wallingford CT, 2016.

[3] A. D. Becke, *J. Chem. Phys.*, 1993, **98**, 5648–5652.

[4] C. Lee, W. Yang, R. G. Parr, *Phys. Rev. B: Condens. Matter Mater. Phys.*, 1988, **37**, 785–789.

[5] S. Grimme, J. Antony, S. Ehrlich, H. Krieg, *J. Chem. Phys.*, 2010, **132**, 154104.

[6] F. Weigend, R. Ahlrichs, *Phys. Chem. Chem. Phys.*, 2005, **7**, 3297–3305.

[7] F. Weigend, *Phys. Chem. Chem. Phys.*, 2006, **8**, 1057–1065.

[8] C. Y. Legault, CYLview, 1.0b, Université de Sherbrooke, 2009, <http://www.cylview.org>.

[9] H. Y. Aboul-Enein, L. I. Abou-Basha, S. A. Bakr, *Chirality*, 1996, **8**, 153–156.

[10] O. Yoshio, A. Ryo, F. Tohru, H. Koichi, *Chem. Lett.*, 1987, **16**, 1857–1860.
